# Supplementary material for: A thesaurus of genetic variation for interrogation of repetitive genomic regions
Source: PubMed Central journal article supplement (PMC4446415; doi:10.1093/nar/gkv178), 2015-03-27
Supplement: supp_gkv178_nar-03253-met-n-2014-File007.pdf [file supp_gkv178_nar-03253-met-n-2014-File007.pdf]

# ***Supplementary Text:*** **A thesaurus of genetic variation for interrogation of repetitive genomic regions**

C. Kerzendorfer<sup>1,\*</sup>, T. Konopka<sup>1,2,\*</sup>, and S.M.B. Nijman<sup>1,2,\*</sup>

<sup>1</sup> *Research Center for Molecular Medicine of the Austrian Academy of Sciences (CeMM), Vienna, Austria*

<sup>2</sup> *Present address: Ludwig Institute for Cancer Research, University of Oxford, Oxford, UK*

\* *Authors in alphabetical order*

## **Contents**

|          |                                                         |           |
|----------|---------------------------------------------------------|-----------|
| <b>1</b> | <b>Supplementary Methods</b>                            | <b>2</b>  |
| 1.1      | Thesaurus generation . . . . .                          | 2         |
| 1.2      | Alignments . . . . .                                    | 2         |
| 1.3      | Running times . . . . .                                 | 2         |
| 1.4      | Sanger validation . . . . .                             | 2         |
| <b>2</b> | <b>Results - single-end synthetic dataset</b>           | <b>3</b>  |
| 2.1      | Independence of local calling approach . . . . .        | 3         |
| 2.2      | Thesaurus annotation . . . . .                          | 4         |
| 2.3      | Properties of annotated variants . . . . .              | 6         |
| <b>3</b> | <b>Results - paired-end synthetic dataset</b>           | <b>7</b>  |
| 3.1      | Thesaurus calls . . . . .                               | 7         |
| 3.2      | Properties of annotated variants . . . . .              | 8         |
| <b>4</b> | <b>Results - KBM7 cell line</b>                         | <b>9</b>  |
| 4.1      | Properties of annotated variants . . . . .              | 9         |
| 4.2      | Sanger Validation in KBM7 . . . . .                     | 10        |
| 4.3      | Functional mapping . . . . .                            | 11        |
| <b>5</b> | <b>Results - Exome cohorts</b>                          | <b>12</b> |
| 5.1      | Sample processing . . . . .                             | 12        |
| 5.2      | Variant analysis . . . . .                              | 14        |
| 5.3      | Sanger validation in breast cancer cell lines . . . . . | 15        |
|          | <b>References</b>                                       | <b>17</b> |

## 1 Supplementary Methods

We collect here supplementary notes on the software and settings used throughout the analysis.

### 1.1 Thesaurus generation

Thesaurus generation was performed in two main stages. First, we created synthetic reads from the reference genome and created files with exhaustive multiple mappings for each read. These alignments were executed on a compute cluster (approximate running time: 8000 processor hours). Second, we compiled the information in the multiple alignments into a single thesaurus table for the entire genome. These post-alignment computations were performed on a four-core server (approximate running time: 100 processor hours). All steps of the procedure were implemented in custom software written in Java using Picard (<http://sourceforge.net/projects/picard>) and other third-party libraries.

### 1.2 Alignments

We aligned synthetic and KBM7 datasets onto the hg19 reference genome using Bowtie2 (v2.0.8) [1] using the predefined `--very-sensitive` settings. In calculations using an alternate fast aligner and for the exome panel, we used GSNAP (v2013-07-30 and v201407-04) [2] together with an index created with settings `-k 14 -q 1`.

### 1.3 Running times

The approximate running time for variant calling on a 30x whole genome dataset with Bamformatics was around 2 hours. The running time for exomes was around 30 minutes.

The approximate running time for thesaurus filtering of a call set based on a 30x whole-genome dataset was around 8 hours (single processor with access to 24 GB of memory). Lower coverage datasets ran faster and required less memory. Analysis of one exome dataset was around 30 minutes.

### 1.4 Sanger validation

For Sanger validation, we cultured cells as described by the cell providers, extracted DNA using a Qiagen DNA-extraction kit, and amplified regions of interest via PCR (see below for primer sequences). Sanger sequencing was performed by MicroSynth GmbH, Vienna, Austria.

## 2 Results - single-end synthetic dataset

The single-end synthetic dataset (described in the main text) consists of reads sampled at regular intervals from a haploid genome based on hg19, but containing a set of randomly placed substitution variants. Alignments were generated with Bowtie 2 [1].

### 2.1 Independence of local calling approach

We called variants with three distinct variant callers, GATK v.3.2.2 [3], Varscan v2.3.7 [4], and Bamformatics v0.1.2/3 (<http://sourceforge.net/projects/bamformatics/>). We aimed to explore the effect of mappability on each of these callers.

- For GATK, we produced one set of calls with the `UnifiedGenotyper` tool with defaults settings. From this single call set, we produced subsets by filtering by the `MQ` tag associated with each called variant. We also tried to use the `Haplotypecaller`, but we noted this produced fewer variants than the `UnifiedGenotyper` on our datasets.
- Varscan does not operate directly on alignment files, but rather uses input from `samtools mpileup`. To vary mapping quality thresholds, we thus repeated the calling procedure for each mapping quality threshold and changed the `-q` argument when running `samtools mpileup`. All other Varscan settings were left at the default values.
- For Bamformatics, we called variants independently for each mapping quality threshold by varying the `--minmapqual` setting. All other settings were left at the default values.

Although the interpretation of the threshold varies across the methods (Table S1), ROC analysis shows that the overall performance of the three callers is comparable (Figure S1). This is not surprising because the synthetic dataset did not contain difficult features other than variants in low mappability regions. Since all three callers process the data one position/region at a time and produce output in `vcf` format, they all encounter the same limitations in repetitive regions.

| MQ | GATK    |    |        | Varscan |       |        | Bamformatics |       |        |
|----|---------|----|--------|---------|-------|--------|--------------|-------|--------|
|    | TP      | FP | FN     | TP      | FP    | FN     | TP           | FP    | FN     |
| 0  | 2734774 | 32 | 161992 | 2777987 | 15841 | 118779 | 2830013      | 87071 | 66753  |
| 1  | 2734774 | 32 | 161992 | 2777965 | 15831 | 118801 | 2830030      | 86241 | 66736  |
| 2  | 2734774 | 32 | 161992 | 2727978 | 33    | 168788 | 2778074      | 399   | 118692 |
| 3  | 2734774 | 32 | 161992 | 2727947 | 33    | 168819 | 2778069      | 300   | 118697 |
| 4  | 2734774 | 32 | 161992 | 2727939 | 32    | 168827 | 2778069      | 294   | 118697 |
| 6  | 2734774 | 32 | 161992 | 2727926 | 32    | 168840 | 2778068      | 285   | 118698 |
| 8  | 2734758 | 31 | 162008 | 2692080 | 3     | 204686 | 2750550      | 88    | 146216 |
| 10 | 2733965 | 20 | 162801 | 2692080 | 3     | 204686 | 2750550      | 88    | 146216 |
| 12 | 2729948 | 16 | 166818 | 2689488 | 3     | 207278 | 2749132      | 80    | 147634 |
| 16 | 2707969 | 10 | 188797 | 2665764 | 1     | 231002 | 2729225      | 28    | 167541 |
| 20 | 2679023 | 2  | 217743 | 2622416 | 1     | 274350 | 2693874      | 5     | 202892 |
| 24 | 2639792 | 2  | 256974 | 2601299 | 1     | 295467 | 2685312      | 3     | 211454 |
| 28 | 2574743 | 1  | 322023 | 2390899 | 0     | 505867 | 2558957      | 2     | 337809 |
| 32 | 2508043 | 1  | 388723 | 2390899 | 0     | 505867 | 2558957      | 2     | 337809 |
| 36 | 2430046 | 0  | 466720 | 2347200 | 0     | 549566 | 2506832      | 2     | 389934 |
| 40 | 2301667 | 0  | 595099 | 2347200 | 0     | 549566 | 2506832      | 2     | 389934 |

Table S1: **Variant calling performance with three local variant callers.** Columns marked GATK, Varscan, and Bamformatics represent results obtained from three distinct variant callers. MQ: mapping quality threshold. TP, FP, FN: absolute numbers of true positives, false positives, and false negatives.

## 2.2 Thesaurus annotation

We explored the performance gain due to thesaurus annotation. We decided to use calls from Bamformatics because this caller produced the largest call set at the low mappability thresholds; it thus produced the most candidates that could in principle represent true hits. We performed thesaurus filtering using default settings, but with minimum mapping quality set to match that used during variant calling. A comparison with true calls appears in Table S2.

We also ran control calculations to make sure that the performance gains are not due to spurious connections between genomic positions. We generated files with random links between thesaurus-annotated variants and other genomic positions in low mappability regions, following the distributions of the true thesaurus links (i.e. if a site was linked with three other sites, we generated three random links). We found random links did not give rise to substantial performance improvements (Table S2).

For ROC analysis, we used the following definitions of “false positive rate” (FPR) and “thesaurus true positive rate” (TTPR):

$$[FPR] = \frac{[FP]}{[FP] + [TN]}, \quad (1)$$

$$[TTPR] = \frac{[TP] + [TTP]}{[TP] + [TTP] + [FN]}, \quad (2)$$

where we used  $[TN] = 3 \times 10^9$  for the human genome. A ROC-style representation of the results appears in Figure S1.

We also ran thesaurus annotation on select sets of calls from the other variant callers. In all cases, the results were qualitatively similar to those found based on Bamformatics (data not shown).

| MQ | Bamformatics |       |        |     | with Thesaurus |     |        |       | with Random |       |        |     |
|----|--------------|-------|--------|-----|----------------|-----|--------|-------|-------------|-------|--------|-----|
|    | TP           | FP    | FN     | TTP | TP             | FP  | FN     | TTP   | TP          | FP    | FN     | TTP |
| 0  | 2830013      | 87071 | 66753  | 0   | 2829609        | 143 | 30448  | 85343 | 2830013     | 86558 | 66660  | 490 |
| 1  | 2830030      | 86241 | 66736  | 0   | 2829627        | 52  | 30441  | 85304 | 2830030     | 85754 | 66648  | 482 |
| 2  | 2778074      | 399   | 118692 | 0   | 2777946        | 26  | 118540 | 227   | 2778074     | 379   | 118687 | 15  |
| 3  | 2778069      | 300   | 118697 | 0   | 2777943        | 23  | 118545 | 225   | 2778069     | 286   | 118692 | 11  |
| 4  | 2778069      | 294   | 118697 | 0   | 2777943        | 20  | 118545 | 224   | 2778069     | 280   | 118692 | 11  |
| 6  | 2778068      | 285   | 118698 | 0   | 2777942        | 19  | 118546 | 222   | 2778068     | 271   | 118694 | 12  |
| 8  | 2750550      | 88    | 146216 | 0   | 2750487        | 8   | 146158 | 67    | 2750550     | 81    | 146213 | 7   |
| 10 | 2750550      | 88    | 146216 | 0   | 2750487        | 8   | 146158 | 67    | 2750550     | 81    | 146213 | 7   |
| 12 | 2749132      | 80    | 147634 | 0   | 2749069        | 6   | 147581 | 61    | 2749132     | 72    | 147631 | 8   |
| 16 | 2729225      | 28    | 167541 | 0   | 2729196        | 1   | 167524 | 19    | 2729225     | 25    | 167538 | 3   |
| 20 | 2693874      | 5     | 202892 | 0   | 2693866        | 0   | 202888 | 5     | 2693874     | 5     | 202892 | 0   |
| 24 | 2685312      | 3     | 211454 | 0   | 2685306        | 0   | 211451 | 3     | 2685312     | 3     | 211454 | 0   |
| 28 | 2558957      | 2     | 337809 | 0   | 2558957        | 0   | 337807 | 2     | 2558957     | 2     | 337809 | 0   |
| 32 | 2558957      | 2     | 337809 | 0   | 2558957        | 0   | 337807 | 2     | 2558957     | 2     | 337809 | 0   |
| 36 | 2506832      | 2     | 389934 | 0   | 2506832        | 0   | 389932 | 2     | 2506832     | 2     | 389934 | 0   |
| 40 | 2506832      | 2     | 389934 | 0   | 2506832        | 0   | 389932 | 2     | 2506832     | 2     | 389934 | 0   |

Table S2: **Thesaurus performance on synthetic dataset.** Group labeled “Bamformatics” shows performance of local variant calling using Bamformatics (v0.1.2/v0.1.3). Group ”with Thesaurus” gives performance of Bamformatics calls augmented by thesaurus annotations. Group “with Random” gives performance of Bamformatics calls augmented by randomly generated links mimicking thesaurus annotation. MQ: minimum mapping quality used during variant calling. TP, FP, FN, and TTP: absolute numbers of true positives, false positives, false negatives, and thesaurus true positives. Total number of variants under “Bamformatics” and “with Thesaurus” differ because variants labeled as `thesaurushard` or `thesaurusmany` were eliminated from the analysis in the latter case.

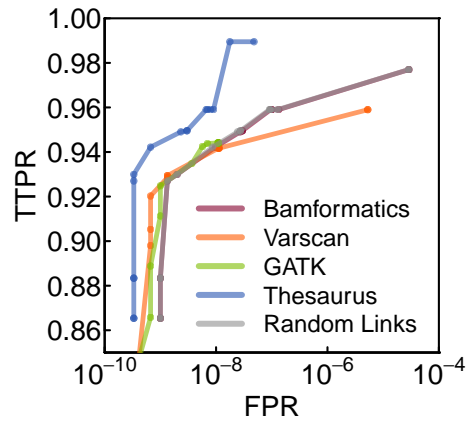

Figure S1: **ROC-style representation of calling performance using three variant callers.** ROC-style curves show performance of traditional and thesaurus-aided variant calling. Red, orange, and green lines represent performance of three local variants callers: Bamformatics, Varscan, and GATK, respectively. Blue curve shows performance of Thesaurus annotation based on Bamformatics output. Gray curve, which overlaps the curve, shows a lack of performance change for Bamformatics output augmented by randomly generated links mimicking thesaurus annotation.

### 2.3 Properties of annotated variants

We explored various properties of the annotated variants and the alternate variant loci (Figure S2). When using a very low mapping quality threshold (MQ 1), several of the called variants could be connected together via thesaurus links. The size of these clusters (only among the called variants) was rarely greater than three (Figure S2A). However, the number of alternate loci associated with called sites ranged from one to many thousand, with the majority of sites linking to ten or fewer (Figure S2B).

We then calculated the B-allele frequencies (BAF) for variants annotated with the thesaurus resource. When we estimated the frequency using only the reads at the called position, we found most sites had BAFs substantially smaller than one, which is incorrect since the synthetic genome was haploid. Alternate loci were valuable in better estimating the BAF for these variants (Figure S2C).

We also noted that accounting for alternate loci substantially decreased the apparent error rate on non-called sites (Figure S2D). To evaluate error rates, we used the `errors` tool in the Bamformatics toolkit with parameters set to `--maxallelic 0.05 --maxdepth 3`. We restricted attention to specific regions and noted that the apparent error rate was three orders of magnitude lower in well-mappable areas than in non-mappable areas. The error estimate was much reduced after removing alternate sites found during filtering, but not when removing the same number of randomly picked loci within low-mappability regions (Figure S2D). The error rate did not drop to zero after accounting for alternate sites, possibly because some variants still remained undiscovered (see ROC curve, and FN in Table S2).

When using higher mapping quality thresholds (e.g. MQ 16 in the figure), the number of sites annotated by thesaurus filtering was much reduced, and consequently the effects were less pronounced. Interestingly, the error rate among reads with high mapping quality was still two orders of magnitude higher on thesaurus covered regions than on the rest of the genome. This suggests that some reads assigned with high MQ during alignment are actually misplaced.

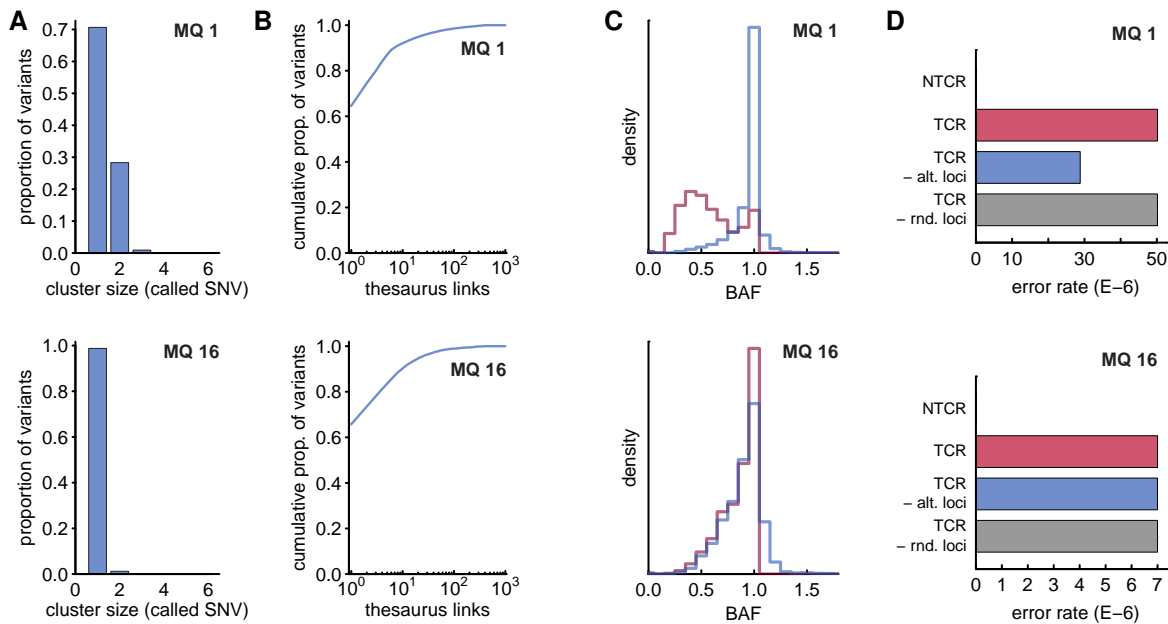

Figure S2: **Properties of thesaurus annotations on synthetic data (single-end).** (Top row) Results obtained with mapping quality (MQ) threshold 1. (Bottom row) Results with MQ threshold 16. (A) Cluster sizes among the variants annotated with the thesaurus (if a called variant is annotated with several alternate loci, of which only one is a called variant, the cluster size is two) (B) Cumulative distribution function of thesaurus links associated with annotated variants. (C) Distribution of B-allele frequencies attributed to thesaurus-annotated variants: red shows local estimates based on read counting, blue shows estimates based on read counting using alternate loci. (D) Error rates on genomic regions. (NTCR) rate on regions not covered by the thesaurus resource. (TCR) rate on thesaurus-covered regions. (TCR-alt.loci) rate on TCR regions avoiding sites identified during thesaurus filtering. (NTCR-rnd.loci) rate on low-mappability regions avoiding randomly selected sites (repeated five times, error bars are too small to see).

### 3 Results - paired-end synthetic dataset

Following tests with single-end data, we repeated the analysis on analogous paired-end data based on the same genome. We generated paired-end pairs at regular intervals of 20bp and with insert size of 290; overall this scheme gives data with expected coverage of 10× as before. Alignments were again generated with Bowtie 2.

#### 3.1 Thesaurus calls

As for the single-end datasets, we generated initial calls using GATK, Varscan, and Bamformatics and found the three callers to be comparable (Figure S3). We thus again chose to work with calls from Bamformatics. Thesaurus filtering was performed using default settings, but with minimum mapping quality set to match those used for variant calling (Table S3 and Figure S3). In comparison with the single-end dataset, the number of calls was larger because paired-end reads were effectively longer (200bp vs 100bp) and could thus be mapped with more confidence. Regardless, thesaurus filtering still dramatically improved performance, bringing the (thesaurus) true positive rate very near to unity (Figure S3).

| MQ | Bamformatics |       |        |     | with Thesaurus |    |        |       | with Random |       |        |     |
|----|--------------|-------|--------|-----|----------------|----|--------|-------|-------------|-------|--------|-----|
|    | TP           | FP    | FN     | TTP | TP             | FP | FN     | TTP   | TP          | FP    | FN     | TTP |
| 0  | 2865191      | 71406 | 31575  | 0   | 2852539        | 12 | 8616   | 71004 | 2865191     | 71104 | 31558  | 302 |
| 1  | 2865194      | 71406 | 31572  | 0   | 2852539        | 12 | 8613   | 71004 | 2865194     | 71105 | 31549  | 301 |
| 2  | 2819633      | 57    | 77133  | 0   | 2807510        | 0  | 77115  | 26    | 2819633     | 54    | 77133  | 3   |
| 3  | 2819633      | 57    | 77133  | 0   | 2807510        | 0  | 77115  | 26    | 2819633     | 54    | 77133  | 3   |
| 4  | 2819633      | 57    | 77133  | 0   | 2807510        | 0  | 77115  | 26    | 2819633     | 54    | 77133  | 3   |
| 6  | 2819633      | 57    | 77133  | 0   | 2807510        | 0  | 77115  | 26    | 2819633     | 54    | 77133  | 3   |
| 8  | 2782820      | 7     | 113946 | 0   | 2774295        | 0  | 113946 | 0     | 2782820     | 7     | 113946 | 0   |
| 10 | 2782820      | 7     | 113946 | 0   | 2774295        | 0  | 113946 | 0     | 2782820     | 7     | 113946 | 0   |
| 12 | 2782673      | 7     | 114093 | 0   | 2774169        | 0  | 114093 | 0     | 2782673     | 7     | 114093 | 0   |
| 16 | 2757133      | 7     | 139633 | 0   | 2751794        | 0  | 139633 | 0     | 2757133     | 7     | 139633 | 0   |
| 20 | 2716571      | 7     | 180195 | 0   | 2714712        | 0  | 180195 | 0     | 2716571     | 7     | 180195 | 0   |
| 24 | 2697043      | 1     | 199723 | 0   | 2695569        | 0  | 199723 | 0     | 2697043     | 1     | 199723 | 0   |
| 28 | 2645923      | 1     | 250843 | 0   | 2644535        | 0  | 250843 | 0     | 2645923     | 1     | 250843 | 0   |
| 32 | 2645923      | 1     | 250843 | 0   | 2644535        | 0  | 250843 | 0     | 2645923     | 1     | 250843 | 0   |
| 36 | 2641167      | 1     | 255599 | 0   | 2639778        | 0  | 255599 | 0     | 2641167     | 1     | 255599 | 0   |
| 40 | 2641167      | 1     | 255599 | 0   | 2639778        | 0  | 255599 | 0     | 2641167     | 1     | 255599 | 0   |

Table S3: **Thesaurus performance on synthetic dataset - paired-end.** Analogous to Table S2, but based on paired-end data.

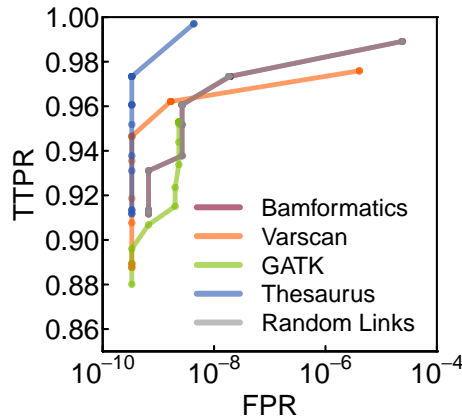

Figure S3: **ROC-style representation of calling performance using three variant callers - paired-end.** Analogous to Figure S1, but based on paired-end data.

### 3.2 Properties of annotated variants

We explored various properties of the annotated variants and the alternate variant loci analogous as for the single-end dataset (Figure S4). Overall, the results were qualitatively similar to those in the single-end dataset. Clusters typically involved three called sites or fewer. Annotations linked called sites to many other sites, sometimes hundreds of sites. BAF estimates were more appropriate using alternative sites. Error estimates were lower when accounting for sites linked to called variants. Notably, the error estimates decreased further here than in the single-end dataset, possibly because there were fewer undetected variants overall.

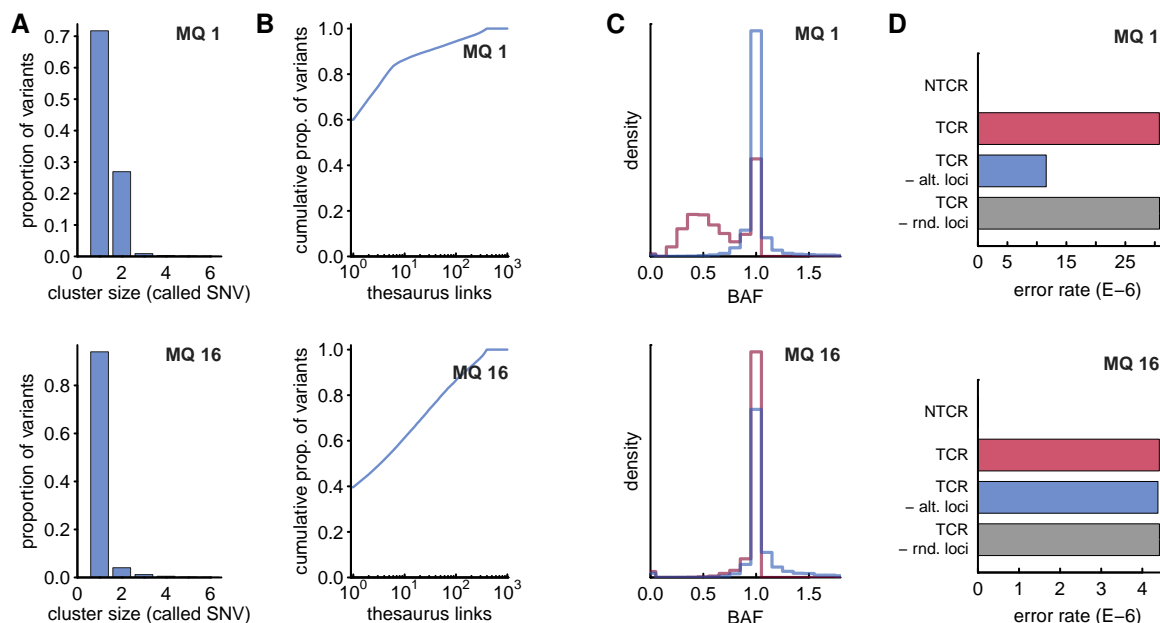

Figure S4: **Properties of thesaurus annotations on synthetic data (paired-end)** Analogous to Figure S2, but here using paired-end synthetic data. (Top row) data obtained from variants detected with low mapping quality threshold (MQ1). (Bottom row) data obtained from variants called at high mapping quality threshold (MQ16).



## 4 Results - KBM7 cell line

We studied thesaurus annotation in a real whole-genome data from the KBM7 cell line. The KBM7 cell line is diploid on chromosome 8 and a portion of chromosome 15, but is otherwise haploid. We used a whole-genome dataset with 2x100bp reads with  $\sim 30\times$  median coverage.

### 4.1 Properties of annotated variants

We evaluated properties of thesaurus-annotated variants in the KBM7 cell line in a similar fashion as for synthetic data (Figure S5).

Compared to the synthetic dataset, the size of clusters formed between called variants was slightly higher (Figure S5A) and the number of alternate loci, despite filtering based on paired-end reads, was sometimes substantially higher (Figure S5B). This may reflect local copy-number variation of low-mappability regions, for example in transposable elements, centromeres, and telomeres.

Alternate sites affected the BAF profile of annotated sites (Figure S5C). Thesaurus-correction removed very low frequencies. However, it did not shift the overall distribution to one perfectly peaked around a single value. This could be due to a number of factors: short-range copy number variation in the cell line may not be reflected in the reference sequence, variants linking to diploid regions may be polluting the results, or depth differences due to GC content or other factors may need to be incorporated into the analysis.

As all real data, the KBM7 reads contained random and systematic sequencing errors in addition to mismatches due to misalignment. Thus, the measured error rate was non-negligible throughout the genome (Figure S5D). Still it was substantially higher in regions of low mappability. Removing alternate sites reduced the estimated error rate (significantly, as compared to removing sets of randomly selected sites, but slightly, as evaluated by a fold change), but not as dramatically as in the synthetic dataset. This suggests that a large number of variants are still undiscovered, or that the documentation of alternate loci was too strict.

At high mapping quality thresholds, the number of identified clusters and cluster sizes decreased. The estimated error rates were equivalent on thesaurus-covered and non-thesaurus-covered regions, indicating that sequencing errors were a larger hindrance in variant detection than misalignments.

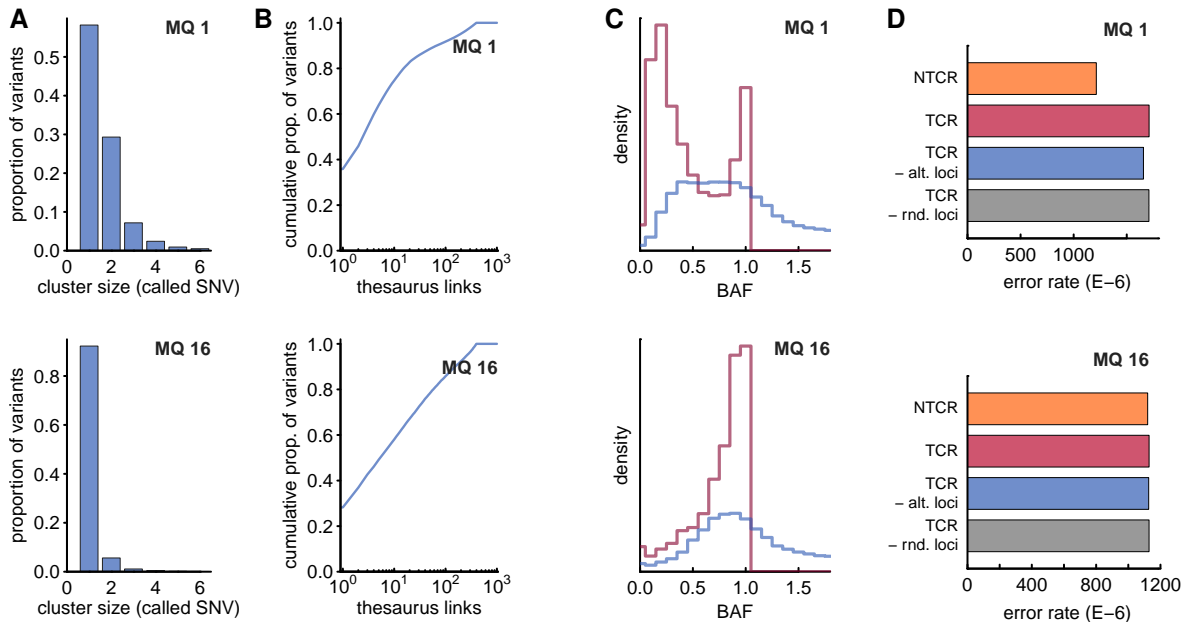

Figure S5: **Properties of thesaurus annotations on KBM7 data.** Analogous to Figure S2 but using whole-genome data from the KBM7 cell line.

## 4.2 Sanger Validation in KBM7

Sanger sequencing was performed on seven clusters of called variants. Primers used are shown in Table (S4). Sanger traces (forward and reverse sequencing) are provided as Supplementary data file (KBM7.Thesaurus.Sanger.zip).

| Cell Line       | Site                      | Gene             | Primer Fw                       | Primer Rev                      |
|-----------------|---------------------------|------------------|---------------------------------|---------------------------------|
| KBM7            | chr1:1666251              | SLC35E2          | CTCCTTTGTAAACAACCTGG            | GGATGAGTGACAGTTCAGC             |
|                 | chr1:1599888              | SLC35E8          |                                 |                                 |
| KBM7            | chr7:151945101            | MLL3             | CCCTACCTGTTTGGACCGAG            | GTGTCCCCACATGAGGAAAAG           |
|                 | chr21:11038843            | BAGE2            |                                 |                                 |
| KBM7            | chr7:151945225            | MLL3             | GTCATGCGAAGGCAAGTCTG            | ACACCAGATCACTGTGCAGC            |
|                 | chr21:11038967            | BAGE2            |                                 |                                 |
| <del>KBM7</del> | <del>chr7:151962168</del> | <del>MLL3</del>  | <del>CTTACTTGCAGTTCTGGCAC</del> | <del>CGGGAGACCTCTTAGATCAG</del> |
| <del></del>     | <del>chr21:11049495</del> | <del>BAGE2</del> |                                 |                                 |
| KBM7            | chr16:1279438             | TPSB2            | CATTGTCCACATCGCCCCAG            | AGCCTGAGAGTCCGCGACCG            |
|                 | chr16:1291454             | TPSAB1           | GTGAGCCTGAGAGTCCACGG            | TAAGACCCTGGCCCCACCTC            |
|                 | chr16:1306817             | TPSD1            | CAGCAAACGGGCATTGTTGG            | TGGCTGGAGATGTTACGCGG            |
| KBM7            | chr17:33769034            | SLFN13           | CAAGGCTATAGGACGCAGGG            | TCCTGTCTAGTTCACCAGG             |
|                 | chr17:33680807            | SLFN11           | CAAGGCTATAGGACGCAGGG            | TTCACATACAGTCCCACCAG            |
| KBM7            | chr19:33490566            | RHPN2            | CAAAGTGGCCACGATGACTC            | TCCGGGGGCAGAAAGGAGAC            |
|                 | chr15:20453992            | intergenic       | TCTGAGGCTCAGGACTGCAC            | TGGCCAGATCCATGAGAGGG            |

Table S4: **Sanger validation.** Blocks of lines indicate clusters of variants linked via the Thesaurus. Where one set of primers is shown, the product was expected to consist of a mixture of both targeted sites. Where multiple primers are shown, each pair was expected to preferentially amplify one of the targeted sites in the cluster. Crossed out entries represent experiments that yielded Sanger traces, but did not show the called variants.

All reactions except those targeting MLL3:chr7:151962168 demonstrated presence of variants at the called positions. In cases where primers were unspecific, Sanger traces showed evidence of multiple alleles (Figure S6). While this is evidence of heterozygous variants in well-mappable regions, this is here indicative of amplification of multiple genomic regions (KBM7 is haploid on the targeted chromosomes).

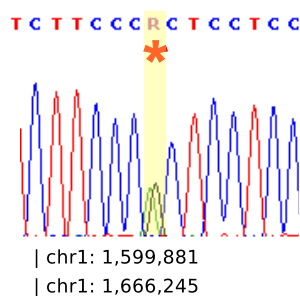

Figure S6: **Sanger validation of low-mapping quality variant in KBM7.** The variant is present on SLC35E2/SLC35E8. The relative proportion of the two alleles is consistent with one variant on a haploid chromosome.

Specific primers were able to distinguish the true site of variation from misalignments. Since the candidate sites were selected with one locus called at higher mapping quality, the higher-mapping-quality variant was always the true site of variation. However, the ploidy of the variants differed in the calls produced by NGS and seen in the Sanger traces (Figure main text).

### 4.3 Functional mapping

To start to assess the importance of the newly called variants, we compared the called loci with functional annotation tracks from ENCODE [5] (Table S5). Although the annotation data are individually available through the UCSC genome browser, we compiled the `bed` files used in the calculation in supplementary data (`Thesaurus.ENCODE.zip`).

| Label   | Description                                                                                                       |
|---------|-------------------------------------------------------------------------------------------------------------------|
| Exon    | Exonic regions, Gencode annotation set (V19)                                                                      |
| Exon.1K | Exonic regions and 1kb flanking regions, Gencode annotation set (V19)                                             |
| Pseudo  | Pseudo genes, Gencode annotation set (V19)                                                                        |
| TF      | Transcription factor binding sites, merge of 161 binding factors on several cell lines (ENCODE-prepared download) |
| DNase   | DNase hypersensitivity regions, merge of cell types (ENCODE-prepared download)                                    |
| H3K4me1 | Histone methylation regions, produced manually by merging data from 7 cell lines                                  |
| H3K4me3 | Histone methylation regions, produced manually by merging data from 7 cell lines.                                 |
| H3K27Ac | Histone acetylation regions, produced manually by merging data from 7 cell lines.                                 |

Table S5: **ENCODE annotations used for functional mapping.** Label refers to the name of the track used in the main text. Description is a short explanation of the track. Histone tracks are manual pools obtained by superposing tracks from the following cell lines: GM12878, H1-hESC, HSMM, HUVEC, K562, NHLEK, and NHLF.

## 5 Results - Exome cohorts

### 5.1 Sample processing

We processed exome samples from breast cancer cell lines [6] and healthy human individuals from around the world [7]. Based on metadata from the SRA (<http://www.ncbi.nlm.nih.gov/sra>), we selected samples marked “WXS” (whole exome sequencing) containing runs of moderate size. We then downloaded unaligned data and applied the following data-processing pipeline. We removed reads with low-base-quality and identical sequences using Triagetools [8]. We aligned the remaining data onto the hg19 reference genome using GSNAP [2].

In the breast cancer cohort, we noticed that many paired reads had very short insert sizes, often leading overlapping paired reads to run into adapter sequences. Although GSNAP typically clips such artifacts, we nonetheless noticed several calls that seemed artefactual due to such reads. In this cohort only, we therefore identified reads that contained more than clipped 10 bases and removed the from the alignments.

The samples in the cell line cohort and the 1000 genomes cohorts were not all sequenced following the same protocol (read length, insert sizes, etc.) In order to reduce the influence of readlength on mappability, we identified samples containing reads shorter than 95 bases and excluded them from the remaining analysis. We also excluded data labeled MDAMB175VII, as we noticed this data to be a duplicate of data for cell line MDAMB157. The remaining 871 samples are shown in Table S6.

| Cohort              | Samples            |           |            |          |             |           |
|---------------------|--------------------|-----------|------------|----------|-------------|-----------|
| BCCL<br>(SRP026538) | 184A1              | 184B5     | 21MT1      | 21MT2    | 21NT        | 21PT      |
|                     | 600MPE             | AU565     | BT20       | BT474    | BT483       | BT549     |
|                     | CAL120             | CAL148    | CAL51      | CAL851   | CAMA1       | EFM19     |
|                     | EFM192A            | EFM192B   | EFM192C    | EVSAT    | HCC1143     | HCC1143BL |
|                     | HCC1187            | HCC1395   | HCC1428    | HCC1937  | HCC1954     | HCC2185   |
|                     | HCC2218            | HCC38BL   | HDQP1      | JIMT1    | LY2         | MCF10A    |
|                     | MCF10F             | MCF12A    | MDAMB134VI | MDAMB157 | MDAMB175VII | MDAMB361  |
|                     | MFM223             | MT3       | MX1        | PMC42    | SKBR3       | SUM102PT  |
|                     | SUM185PE           | SUM225CWN | SUM229PE   | SUM44PE  | SUM52PE     | T4        |
|                     | T47D_KBluc         | UACC893   | ZR751      | ZR7530   | ZR75B       |           |
|                     | ACB<br>(SRP004069) | HG01886   | HG01889    | HG01890  | HG01894     | HG01912   |
| HG02010             |                    | HG02014   | HG02054    | HG02255  | HG02256     | HG02281   |
| HG02282             |                    | HG02317   | HG02318    | HG02449  | HG02450     | HG02470   |
| HG02471             |                    | HG02476   | HG02477    | HG02478  | HG02479     | HG02481   |
| HG02484             |                    | HG02485   | HG02489    | HG02496  | HG02497     | HG02501   |
| HG02502             |                    | HG02505   | HG02508    | HG02511  | HG02536     | HG02537   |
| HG02545             |                    | HG02546   | HG02557    | HG02558  | HG02577     |           |
| ASW<br>(SRP004055)  | NA19922            | NA19923   | NA19984    | NA19985  | NA20126     | NA20127   |
|                     | NA20276            | NA20278   | NA20281    | NA20282  | NA20287     | NA20289   |
|                     | NA20291            | NA20294   | NA20296    | NA20298  | NA20299     | NA20313   |
|                     | NA20314            | NA20317   | NA20322    | NA20332  | NA20334     | NA20336   |
|                     | NA20339            | NA20340   | NA20341    | NA20342  | NA20344     | NA20346   |
|                     | NA20348            | NA20351   | NA20356    | NA20357  | NA20359     | NA20361   |
|                     | NA20362            | NA20412   |            |          |             |           |
| CDX<br>(SRP004062)  | HG02152            | HG02153   | HG02154    | HG02155  | HG02156     | HG02164   |
|                     | HG02165            | HG02166   | HG02168    | HG02169  | HG02170     | HG02173   |
|                     | HG02176            | HG02178   | HG02179    | HG02180  | HG02181     | HG02182   |
|                     | HG02184            | HG02185   | HG02186    | HG02187  | HG02188     | HG02190   |
|                     | HG02358            | HG02405   |            |          |             |           |
| CEU<br>(SRP004078)  | GM06985            | GM07000   | GM07056    | GM07357  | GM10847     | GM10851   |
|                     | GM11829            | GM11831   | GM11832    | GM11840  | GM11992     | GM11993   |
|                     | GM11994            | GM12003   | GM12004    | GM12005  | GM12006     | GM12043   |
|                     | GM12046            | GM12154   | GM12156    | GM12249  | GM12273     | GM12275   |
|                     | GM12283            | GM12414   | GM12716    | GM12718  | GM12751     | GM12761   |
|                     | GM12763            | GM12813   | GM12814    | GM12872  | GM12873     | GM12874   |
|                     | NA06994            | NA11830   | NA11881    | NA11995  | NA12044     | NA12144   |
|                     | NA12155            | NA12234   | NA12272    | NA12282  | NA12286     | NA12489   |
|                     | NA12717            | NA12760   | NA12762    | NA12812  | NA12815     |           |
|                     |                    |           |            |          |             |           |
| CHB<br>(SRP004364)  | NA18525            | NA18527   | NA18528    | NA18531  | NA18591     | NA18614   |
|                     | NA18615            | NA18617   | NA18618    | NA18619  | NA18625     | NA18626   |
|                     | NA18627            | NA18628   | NA18629    | NA18630  | NA18639     | NA18640   |
|                     | NA18641            | NA18642   | NA18643    | NA18644  | NA18645     | NA18646   |
|                     | NA18647            | NA18648   | NA18740    | NA18745  | NA18747     | NA18748   |
|                     | NA18749            | NA18757   | NA18791    | NA18794  | NA18795     |           |
| CHS<br>(SRP004365)  | HG00559            | HG00560   | HG00565    | HG00566  | HG00592     | HG00593   |
|                     | HG00595            | HG00596   | HG00716    | HG00717  |             |           |

|                    |                    |         |         |         |         |         |         |
|--------------------|--------------------|---------|---------|---------|---------|---------|---------|
| CLM<br>(SRP004070) | HG01112            | HG01113 | HG01124 | HG01125 | HG01133 | HG01134 |         |
|                    | HG01136            | HG01137 | HG01139 | HG01140 | HG01148 | HG01149 |         |
|                    | HG01250            | HG01251 | HG01253 | HG01254 | HG01271 | HG01272 |         |
|                    | HG01274            | HG01275 | HG01277 | HG01278 | HG01344 | HG01345 |         |
|                    | HG01347            | HG01348 | HG01356 | HG01357 | HG01360 | HG01452 |         |
|                    | HG01453            | HG01455 | HG01456 | HG01468 | HG01471 | HG01473 |         |
|                    | HG01474            | HG01477 | HG01479 | HG01480 | HG01482 | HG01483 |         |
|                    | HG01494            | HG01495 | HG01497 | HG01498 | HG01550 | HG01551 |         |
|                    | FIN<br>(SRP004058) | HG00173 | HG00177 | HG00178 | HG00179 | HG00180 | HG00181 |
|                    |                    | HG00182 | HG00183 | HG00185 | HG00186 | HG00187 | HG00188 |
| HG00189            |                    | HG00190 | HG00266 | HG00267 | HG00269 | HG00270 |         |
| HG00302            |                    | HG00303 | HG00304 | HG00349 | HG00350 | HG00351 |         |
| HG00355            |                    | HG00356 | HG00358 | HG00359 | HG00360 | HG00362 |         |
| HG00364            |                    | HG00365 |         |         |         |         |         |
| GBR<br>(SRP004060) | HG00096            | HG00097 | HG00099 | HG00101 | HG00102 | HG00103 |         |
|                    | HG00104            | HG00105 | HG00106 | HG00107 | HG00112 | HG00114 |         |
|                    | HG00115            | HG00118 | HG00122 | HG00126 | HG00127 | HG00128 |         |
|                    | HG00129            | HG00130 | HG00132 | HG00134 | HG00135 | HG00141 |         |
|                    | HG00142            | HG00143 | HG00148 | HG00149 | HG00150 | HG00151 |         |
|                    | HG00152            | HG00156 | HG00231 | HG00233 | HG00234 | HG00235 |         |
|                    | HG00238            | HG00240 | HG00247 | HG01789 | HG01790 | HG04301 |         |
|                    | HG04302            | HG04303 |         |         |         |         |         |
| GIH<br>(SRP004056) | NA20882            | NA20883 | NA20884 | NA21089 | NA21090 | NA21091 |         |
|                    | NA21092            | NA21094 | NA21097 | NA21098 | NA21099 | NA21100 |         |
|                    | NA21101            | NA21102 | NA21103 | NA21104 | NA21105 | NA21106 |         |
|                    | NA21107            | NA21108 | NA21109 | NA21110 | NA21111 | NA21112 |         |
|                    | NA21113            | NA21115 | NA21116 | NA21117 | NA21118 | NA21119 |         |
|                    | NA21120            | NA21121 | NA21122 | NA21123 | NA21125 |         |         |
| GWD<br>(SRP004065) | HG02762            | HG02763 | HG02869 | HG02870 | HG03033 | HG03034 |         |
|                    | HG03249            | HG03250 |         |         |         |         |         |
| IBS<br>(SRP004061) | HG01500            | HG01501 | HG01503 | HG01504 | HG01515 | HG01516 |         |
|                    | HG01518            | HG01519 | HG01521 | HG01522 | HG01602 | HG01603 |         |
|                    | HG01605            | HG01606 | HG01607 | HG01608 | HG01610 | HG01612 |         |
|                    | HG01613            | HG01615 | HG01617 | HG01618 | HG01619 | HG01620 |         |
|                    | HG01623            | HG01624 | HG01625 | HG01626 | HG01628 | HG01630 |         |
|                    | HG01668            | HG01669 | HG01670 | HG01672 | HG01756 | HG01757 |         |
|                    | HG01761            | HG01762 | HG01770 | HG01771 | HG01773 | HG01775 |         |
|                    | HG01776            | HG01777 | HG01779 | HG01781 | HG01783 | HG01784 |         |
|                    | HG01785            | HG01786 | HG02218 | HG02219 | HG02220 | HG02221 |         |
|                    | HG02235            | HG02236 |         |         |         |         |         |
| JPT<br>(SRP004076) | NA18939            | NA18941 | NA18946 | NA18954 | NA18955 | NA18956 |         |
|                    | NA18957            | NA18962 | NA18963 | NA18965 | NA18966 | NA18967 |         |
|                    | NA18968            | NA18969 | NA18970 | NA18971 | NA18972 | NA18973 |         |
|                    | NA18974            | NA18975 | NA18976 | NA18977 | NA18978 | NA18979 |         |
|                    | NA18980            | NA18981 | NA18987 | NA18990 | NA18991 | NA18992 |         |
|                    | NA18993            | NA18994 | NA18995 | NA18997 | NA18998 | NA19001 |         |
|                    | NA19002            | NA19005 | NA19009 | NA19010 | NA19072 | NA19074 |         |
|                    | NA19075            | NA19076 | NA19077 | NA19079 | NA19080 | NA19081 |         |
|                    | NA19082            | NA19083 | NA19084 | NA19085 | NA19086 |         |         |
|                    | KHV<br>(SRP004063) | HG01870 | HG01871 | HG01872 | HG01873 | HG01874 | HG01878 |
| HG02016            |                    | HG02017 | HG02019 | HG02020 | HG02035 | HG02048 |         |
| HG02049            |                    | HG02057 | HG02058 | HG02069 | HG02070 | HG02072 |         |
| HG02073            |                    | HG02075 | HG02076 | HG02078 | HG02079 | HG02081 |         |
| HG02082            |                    | HG02084 | HG02085 | HG02086 | HG02087 | HG02088 |         |
| HG02113            |                    | HG02121 | HG02122 | HG02127 | HG02128 | HG02138 |         |
| HG02139            |                    | HG02140 | HG02141 | HG02524 | HG02525 |         |         |
| LWK<br>(SRP004075) |                    | NA19020 | NA19027 | NA19028 | NA19031 | NA19035 | NA19036 |
|                    | NA19038            | NA19041 | NA19044 | NA19307 | NA19308 | NA19309 |         |
|                    | NA19310            | NA19311 | NA19312 | NA19313 | NA19314 | NA19315 |         |
|                    | NA19316            | NA19317 | NA19318 | NA19319 | NA19321 | NA19324 |         |
|                    | NA19327            | NA19328 | NA19331 | NA19351 | NA19355 | NA19359 |         |
|                    | NA19360            | NA19371 | NA19372 | NA19374 | NA19375 | NA19376 |         |
|                    | NA19377            | NA19379 | NA19380 | NA19381 | NA19383 | NA19384 |         |
|                    | NA19385            | NA19390 | NA19391 | NA19393 | NA19394 | NA19395 |         |
|                    | NA19397            | NA19398 | NA19399 | NA19401 | NA19403 | NA19404 |         |
|                    | NA19428            | NA19429 | NA19430 | NA19431 | NA19434 | NA19435 |         |
|                    | NA19436            | NA19437 | NA19438 | NA19439 | NA19440 | NA19443 |         |
|                    | NA19445            | NA19446 | NA19448 | NA19449 | NA19451 | NA19452 |         |
|                    | NA19455            | NA19456 | NA19457 | NA19461 | NA19462 | NA19463 |         |
|                    | NA19466            | NA19467 | NA19468 |         |         |         |         |
| MXL<br>(SRP004054) | NA19728            | NA19729 | NA19731 | NA19732 | NA19734 | NA19735 |         |
|                    | NA19737            | NA19740 | NA19741 | NA19746 | NA19747 | NA19750 |         |

|                    |         |         |         |         |         |         |
|--------------------|---------|---------|---------|---------|---------|---------|
|                    | NA19752 | NA19755 | NA19756 | NA19758 | NA19759 | NA19761 |
|                    | NA19762 | NA19764 | NA19770 | NA19771 | NA19773 | NA19774 |
|                    | NA19776 | NA19777 | NA19779 | NA19780 | NA19782 | NA19783 |
|                    | NA19785 | NA19786 | NA19788 | NA19789 | NA19794 | NA19795 |
|                    | NA19797 | NA19798 |         |         |         |         |
| PEL<br>(SRP004071) | HG01565 | HG01566 | HG01571 | HG01572 | HG01953 | HG01954 |
|                    | HG01961 | HG01965 | HG01967 | HG01968 | HG01970 | HG01971 |
|                    | HG01973 | HG01974 | HG01976 | HG01977 | HG01979 | HG01980 |
|                    | HG01991 | HG01992 | HG01995 | HG01997 | HG02002 | HG02003 |
|                    | HG02008 | HG02089 | HG02090 | HG02104 | HG02105 | HG02272 |
|                    | HG02277 | HG02278 | HG02285 | HG02286 | HG02288 | HG02291 |
|                    | HG02292 | HG02298 | HG02299 | HG02301 | HG02344 | HG02345 |
|                    | HG02347 |         |         |         |         |         |
| PUR<br>(SRP004072) | HG00742 | HG00743 | HG01058 | HG01063 | HG01064 | HG01077 |
|                    | HG01088 | HG01089 | HG01092 | HG01161 | HG01162 | HG01164 |
|                    | HG01195 | HG01200 | HG01286 | HG01302 | HG01303 | HG01305 |
|                    | HG01308 | HG01311 | HG01312 | HG01322 | HG01323 | HG01325 |
|                    | HG01326 | HG01398 |         |         |         |         |
| TSI<br>(SRP004073) | NA20502 | NA20503 | NA20504 | NA20505 | NA20506 | NA20507 |
|                    | NA20508 | NA20509 | NA20510 | NA20512 | NA20513 | NA20514 |
|                    | NA20515 | NA20516 | NA20517 | NA20518 | NA20519 | NA20520 |
|                    | NA20521 | NA20522 | NA20524 | NA20525 | NA20526 | NA20527 |
|                    | NA20528 | NA20529 | NA20530 | NA20531 | NA20532 | NA20533 |
|                    | NA20534 | NA20535 | NA20536 | NA20537 | NA20538 | NA20539 |
|                    | NA20540 | NA20541 | NA20807 | NA20808 | NA20809 | NA20810 |
|                    | NA20811 | NA20812 | NA20813 | NA20814 | NA20815 | NA20816 |
|                    | NA20818 | NA20819 | NA20826 | NA20827 | NA20828 | NA20829 |
|                    | NA20831 | NA20832 |         |         |         |         |
| YRI<br>(SRP004074) | NA18502 | NA18505 | NA18507 | NA18508 | NA18917 | NA18923 |
|                    | NA18924 | NA18933 | NA18934 | NA19095 | NA19096 | NA19098 |
|                    | NA19099 | NA19113 | NA19117 | NA19118 | NA19119 | NA19121 |
|                    | NA19131 | NA19138 | NA19141 | NA19143 | NA19144 | NA19146 |
|                    | NA19149 | NA19150 | NA19152 | NA19153 | NA19159 | NA19160 |
|                    | NA19171 | NA19175 | NA19184 | NA19185 | NA19197 | NA19198 |
|                    | NA19200 | NA19201 | NA19204 | NA19206 | NA19207 | NA19209 |
|                    | NA19210 | NA19214 | NA19222 | NA19223 | NA19238 | NA19239 |
|                    | NA19240 |         |         |         |         |         |

Table S6: **Exome samples processed for cohort analysis.** The first column indicates cohort names. BCCL stands for Breast Cancer Cell Lines. Other acronyms are population codes defined by the 1000 Genomes project. SRP codes are SRA accession numbers. The second column shows names of the samples from each cohort.

## 5.2 Variant analysis

After inspecting the alignments, we called variants with mapping quality thresholds set at 16 (MMQ16) and 1 (MMQ1) using Bamformatics. We annotated the variants with dbSNP ids (dbSNP138) and with the thesaurus resource. We flagged variants based on strand bias (tag  $SF > 12$ ), simple-repeat regions (repeatMasker simple repeats and 10 flanking bases), number of distinct read start positions (tag  $DS < 3$ ), mean number of mismatches (tag  $NM > 6$ ), and median mapping quality (tag  $MM < 16$ ).

For each cohort, we first read all the variants called at MMQ16. Then, using calls at MMQ1 and their thesaurus annotations, we identified variants that were newly called at the lower mappability setting and that were not linked to any of the MMQ16 sites. Then, we created subtables of variants in exonic and coding regions of Gencode genes. We split the counts into calls obtained with high and low confidence (based on flags for strand bias, indistinct start positions, large number of mismatches). This allowed us to later discard variants that were always associated with unwanted flags, but include flagged variants when more than two-thirds of samples called a variants without any flags. After processing each cohort separately, we merged the tables together.

### 5.3 Sanger validation in breast cancer cell lines

We performed Sanger sequencing on several variants called in the breast cancer cell lines (Table S7 and Table S8). Sanger traces are provided as a Supplementary data file (`BCCL.Thesaurus.Sanger.zip`). In all cases, primers were not specific to a single genomic location. Rather, they were meant to amplify more than one genomic region. As such, Sanger chromatograms therefore showed evidence of multiple alleles (as in Figure S6). As these cell lines were generally non-haploid, the multiple alleles were often present at unequal proportions.

We note that the tables list variants detected by the calling procedure in the PCR amplified regions. However, the Sanger chromatograms reveal more structure. For example, the experiment with MDAMB468 in gene ASMTL revealed additional variants that were filtered out by the thesaurus annotation due to an insertion (thesaurushard fileter code). This suggests that the annotation can be improved further to reveal even more variants. As another example, Sanger sequencing in MDAMB157 in gene RASA4B showed evidence of variants that were completely absent in the read data.

| Cell Line      | Site                    | Gene             | Primer Fw             | Primer Rev           |
|----------------|-------------------------|------------------|-----------------------|----------------------|
| CAL51          | chrX:1522190            | ASMTL            | CAGTCACGACTACACGCTCC  | CCGTTCTGAGCTCCTGTTGC |
|                | chrY:1472190            | ASMTL            |                       |                      |
| MDAMB468       | chrX:1531648            | ASMTL            | GCCCCGGCCTCCTTGTA AAC | CGGGCGTGACATCACTAACC |
|                | (chrY:1481648)          | ASMTL            |                       |                      |
|                | chrX:1531700            | ASMTL            |                       |                      |
|                | (chrY:1481700)          | ASMTL            |                       |                      |
| HCC1395        | chrX:1537881            | ASMTL            | CCCATGATCTGGGACTCAGC  | ACAAGAGTAGCCCACACAGC |
|                | (chrY:1487881)          | ASMTL            |                       |                      |
|                | chrX:1537919            | ASMTL            |                       |                      |
|                | chrY:1487919            | ASMTL            |                       |                      |
|                | <del>chrX:1537989</del> | <del>ASMTL</del> |                       |                      |
|                | <del>chrY:1487989</del> | <del>ASMTL</del> |                       |                      |
| MDAMB453       | chrX:1553973            | ASMTL            | GCAGACTTCCAAATCGGCGG  | TGCTGGTGGGATTTGTGACC |
|                | chrY:1503973            | ASMTL            |                       |                      |
| HCC1428        | chrX:1557993            | ASMTL            | TTAGGCCCTCATCTGCTGG   | TGAGATGCTCCGTGAGTGCC |
|                | (chrY:1507993)          | ASMTL            |                       |                      |
|                | chrX:1558072            | intronic         |                       |                      |
| (chrY:1508072) | intronic                |                  |                       |                      |
| ZR751          | chrX:1561089            | ASMTL            | GCTGTGCCACCAACTGCATC  | AGGGAAAGCTTGGCGGATGG |
|                | (chrY:1511089)          | ASMTL            |                       |                      |

Table S7: **Sanger validation in gene ASMTL in breast cancer cell lines.** Blocks of lines separated by lines indicate called variants within the PCR product amplified by the primers shown. Smaller blocks separated by white space group clusters of variants linked by thesaurus annotation. Sites in parentheses correspond to positions in dbSNP. Crossed out entries represent variants that were not visible in Sanger chromatograms.

| Cell Line        | Site             | Gene       | Primer Fw             | Primer Rev           |
|------------------|------------------|------------|-----------------------|----------------------|
| MDAMB468         | chr7:102143669   | RASA4B     | ATGTCCCCTCAGAGAGGTCCG | GAGATGGCTATGGGAGCAGG |
|                  | chr7:102242830   | RASA4      |                       |                      |
|                  | chr7:102143808   | RASA4B     |                       |                      |
|                  | chr7:102242969   | RASA4      |                       |                      |
| MDAMB468         | chr7:102143809   | RASA4B     |                       |                      |
|                  | chr7:102242970   | RASA4      |                       |                      |
| HCC1954          | chr7:102128952   | RASA4B     | GCATTTCCCAAACACCTGG   | ATGTTCCACTGGAGGAAGGG |
|                  | chr7:102228124   | RASA4B     |                       |                      |
|                  | chr7:102327203   | intergenic |                       |                      |
| MDAMB157         | chr7:102141519   | intronic   | GTCCCTCTTTGGGGAAGCCG  | ACCTCTGCTGTGGCAGAACC |
|                  | chr7:44005839    | intronic   |                       |                      |
|                  | chr7:102240680   | intronic   |                       |                      |
|                  | chr7:102141562   | RASA4B     |                       |                      |
|                  | chr7:44005882    | POLR2J4    |                       |                      |
|                  | chr7:102240723   | RASA4      |                       |                      |
| MDAMB157         | chr7:102141570   | RASA4B     |                       |                      |
|                  | chr7:44005890    | POLR2J4    |                       |                      |
|                  | chr7:102240731   | RASA4      |                       |                      |
| HCC202           | chr7:102141517   | intronic   | GTCCCTCTTTGGGGAAGCCG  | ACCTCTGCTGTGGCAGAACC |
|                  | chr7:44005837    | intronic   |                       |                      |
|                  | chr7:102240678   | intronic   |                       |                      |
|                  | chr7:102141570   | RASA4B     |                       |                      |
|                  | chr7:44005890    | POLR2J4    |                       |                      |
|                  | chr7:102240731   | RASA4      |                       |                      |
| HCC202           | chr7:102141617   | RASA4B     |                       |                      |
|                  | chr7:44005937    | POLR2J4    |                       |                      |
|                  | chr7:102240778   | RASA4      |                       |                      |
| MDAMB157         | chr7:102135744   | RASA4B     | GGAACAGTGGCTCTCACAGC  | TGCCCTGCATGTGTACCTGG |
|                  | chr7:102234913   | RASA       |                       |                      |
|                  | chr7:102330823   | intergenic |                       |                      |
|                  | (chr7:102135806) | RASA4B     |                       |                      |
|                  | (chr7:102234975) | RASA4      |                       |                      |
| (chr7:102330885) | intergenic       |            |                       |                      |

Table S8: **Sanger validation of variants in gene RASA4B breast cancer cell lines.** Analogous to table S7 but showing variants in gene RASA4B.



## References

- [1] B. Langmead and S. L. Salzberg, “Fast gapped-read alignment with Bowtie 2,” *Nature Methods*, vol. 9, no. 4, pp. 357–359, 2012.
- [2] T. D. Wu and S. Nacu, “Fast and SNP-tolerant detection of complex variants and splicing in short reads,” *Bioinformatics*, vol. 26, no. 7, pp. 873–881, 2010.
- [3] A. McKenna, M. Hanna, E. Banks, A. Sivachenko, K. Cibulskis, A. Kernytsky, K. Garimella, D. Altshuler, S. Gabriel, M. Daly, *et al.*, “The genome analysis toolkit: a MapReduce framework for analyzing next-generation DNA sequencing data,” *Genome Research*, vol. 20, no. 9, pp. 1297–1303, 2010.
- [4] D. C. Koboldt, Q. Zhang, D. E. Larson, D. Shen, M. D. McLellan, L. Lin, C. A. Miller, E. R. Mardis, L. Ding, and R. K. Wilson, “VarScan 2: somatic mutation and copy number alteration discovery in cancer by exome sequencing,” *Genome Research*, vol. 22, no. 3, pp. 568–576, 2012.
- [5] ENCODE Project Consortium and others, “An integrated encyclopedia of dna elements in the human genome,” *Nature*, vol. 489, no. 7414, pp. 57–74, 2012.
- [6] A. Daemen, O. L. Griffith, L. M. Heiser, N. J. Wang, O. M. Enache, Z. Sanborn, F. Pepin, S. Durinck, J. E. Korkola, M. Griffith, *et al.*, “Modeling precision treatment of breast cancer,” *Genome Biol*, vol. 14, no. 10, p. R110, 2013.
- [7] 1000 Genomes Project Consortium and others, “A map of human genome variation from population-scale sequencing,” *Nature*, vol. 467, no. 7319, pp. 1061–1073, 2010.
- [8] D. Fimereli, V. Detours, and T. Konopka, “Triagetools: tools for partitioning and prioritizing analysis of high-throughput sequencing data,” *Nucleic Acids Research*, p. gkt094, 2013.
